# Supplementary material for: A novel fluorescent amphiphilic glycopolymer based on a facile combination of isocyanate and glucosamine
Source: Royal Society of Chemistry journal article supplement (doi:10.1039/c4tc02556c), 2014-12-19
Supplement: c4tc02556c1.pdf [file c4tc02556c1.pdf]

## **Electronic Supplementary Information**

### **Novel fluorescent amphiphilic glycopolymer based on facile combination of isocyanate and glucosamine**

Xiqi Zhang,<sup>\*a,b</sup> Xiaoyong Zhang,<sup>a</sup> Ke Wang,<sup>a</sup> Hongliang Liu,<sup>b</sup> Zhen Gu,<sup>b</sup> Yang Yang<sup>a</sup> and Yen Wei<sup>\*a</sup>

<sup>a</sup> Department of Chemistry and the Tsinghua Center for Frontier Polymer Research, Tsinghua University, Beijing, 100084, P. R. China.

<sup>b</sup> Laboratory of Bio-Inspired Smart Interface Science, Technical Institute of Physics and Chemistry, Chinese Academy of Sciences, Beijing, 100190, P. R. China.

[xqzhang@mail.ipc.ac.cn](mailto:xqzhang@mail.ipc.ac.cn); [weiyen@tsinghua.edu.cn](mailto:weiyen@tsinghua.edu.cn)

## Results

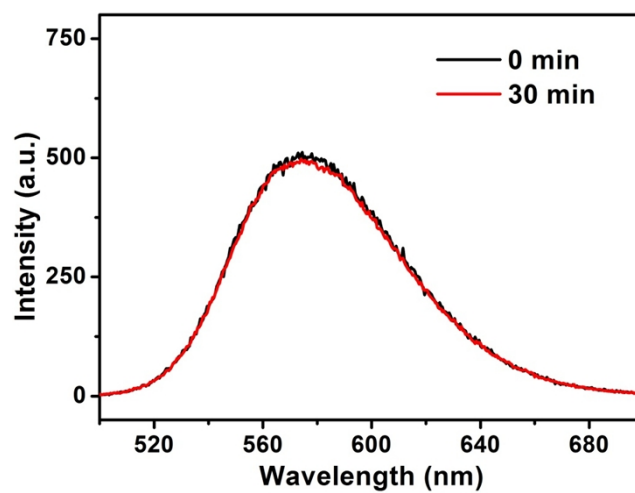

**Fig. S1** PL spectra of **PhE-IM-Glu** FPNs before and after they were irradiated with UV lamp at 365 nm for 30 min.
